# Supplementary material for: Discovery and antitumor evaluation of novel inhibitors of spermine oxidase
Source: PubMed Central journal article supplement — J Enzyme Inhib Med Chem. 2019 Jun 3;34(1):1140–51. doi: 10.1080/14756366.2019.1621863 (PMC6567099; doi:10.1080/14756366.2019.1621863), 2019-06-03
Supplement: IENZ_A_1621863_SM5368.pdf [file IENZ_A_1621863_SM5368.pdf]

**Supplementary Table S1. Chemical structures selected and purchased for the biochemical tests.**

| Compound | Structure                                                                            |
|----------|--------------------------------------------------------------------------------------|
| 1        | 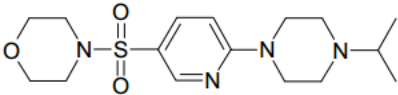   |
| 2        |    |
| 3        |   |
| 4        |  |
| 5        |  |
| 6        |  |

7

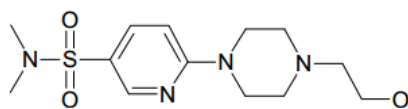

8

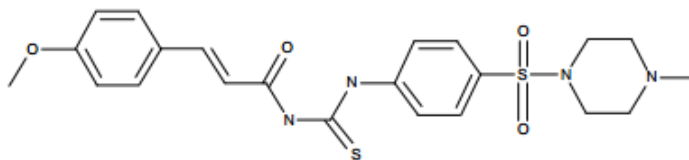

9

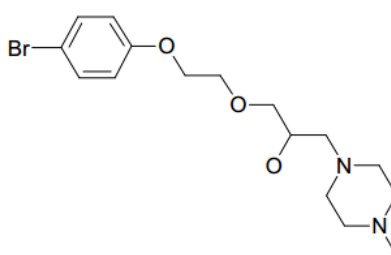

10

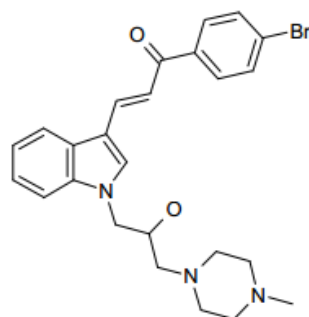

11

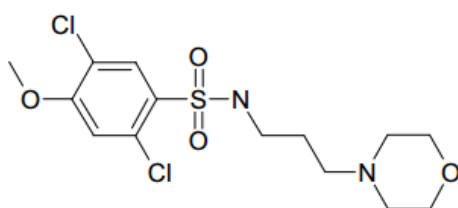

12

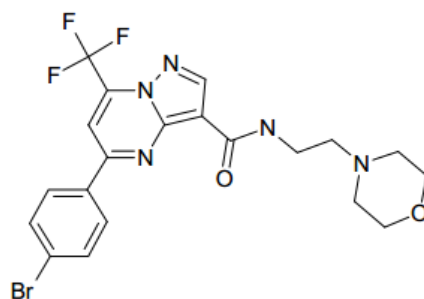

13

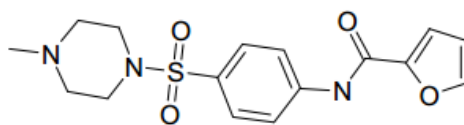

14

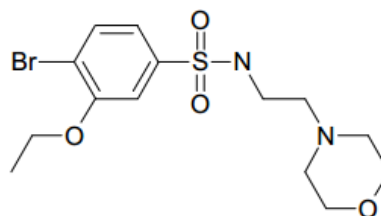

15

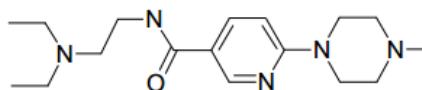

16

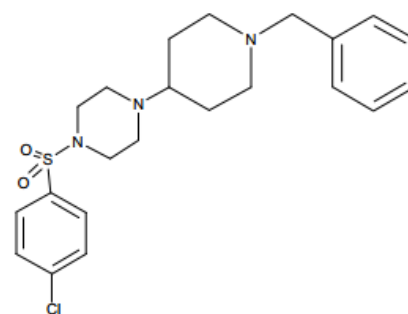

17

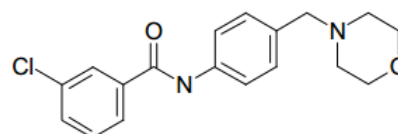

18

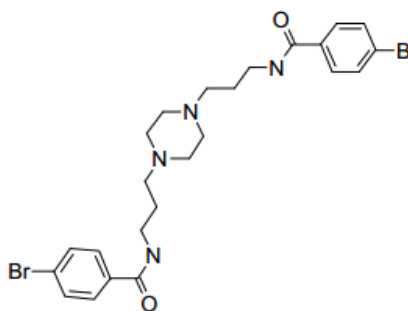

19

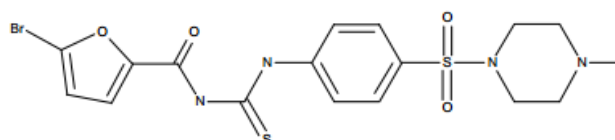

20

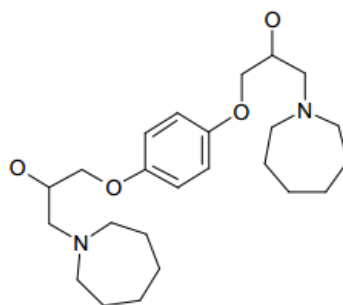

21

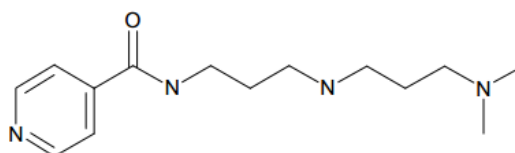

22

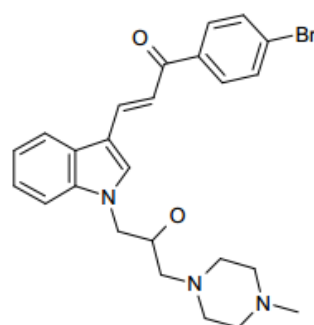

23

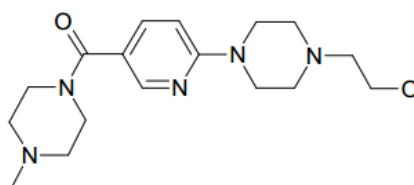

24

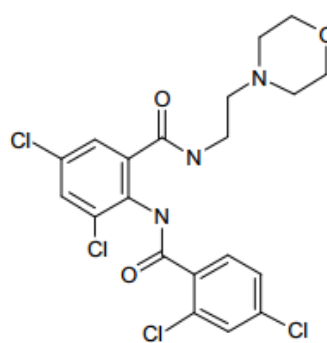

25

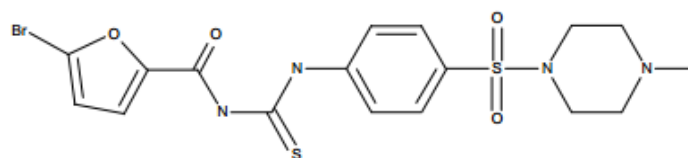

26

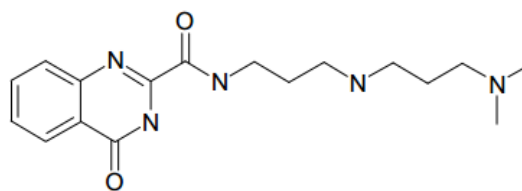

27

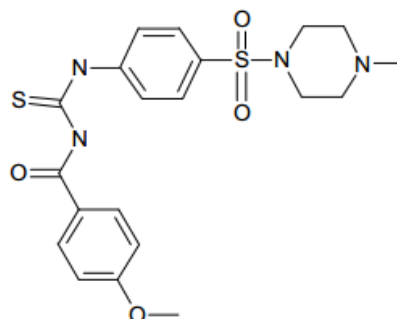

28

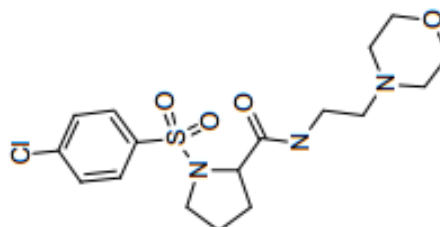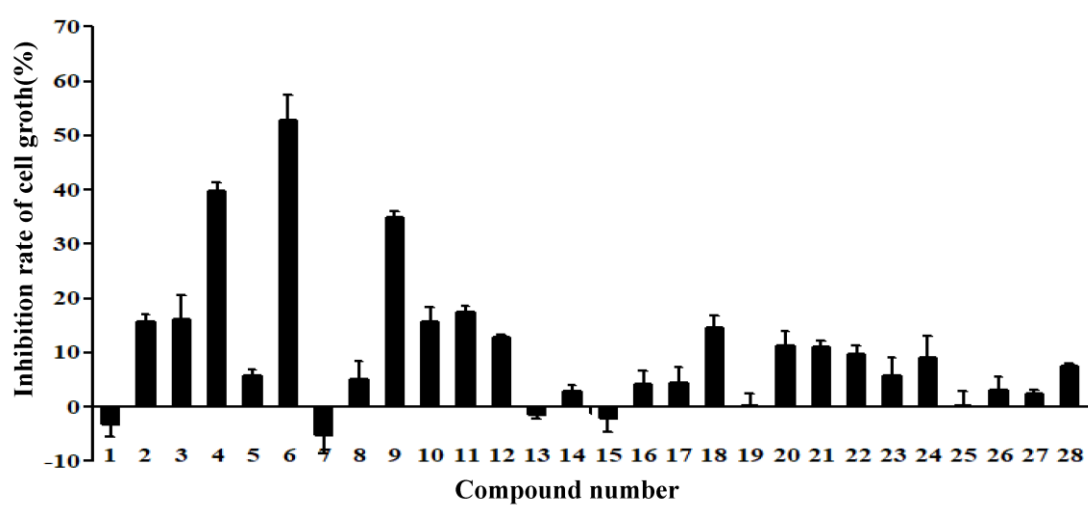

**Supplementary Figure S1. Effects of SI-4650 on cell proliferation in A549 cells.** A549 cells were treated with 80  $\mu\text{mol/L}$  SI-4650 for 48 h. Cell proliferation was then performed by using the MTT assay. The data are shown as means  $\pm$  SD.
